# Supplementary material for: A Flexible and Transparent PtNP/Swcnt/Pet Electrochemical Sensor for Nonenzymatic Detection of Hydrogen Peroxide Released From Living Cells With Real-time Monitoring Capability
Source: Preprints.org preprint supplement (doi:10.20944/preprints202306.0486.v1), 2023-06-07
Supplement: Supplementary file 1 [file supplementary]

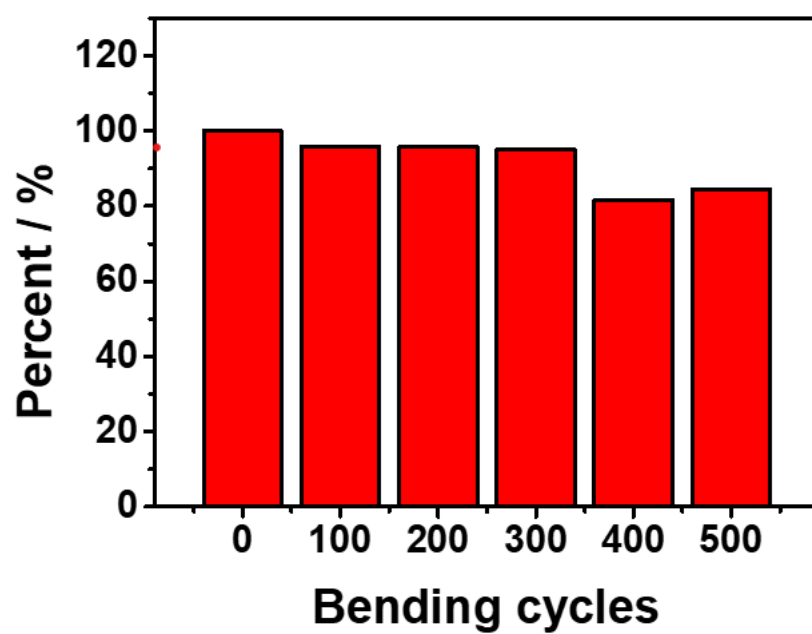

**Figure S3.** Effects of bending cycles on the current response to 100  $\mu\text{M}$   $\text{H}_2\text{O}_2$  using PtNP/SWCNT film bending at 60°.
