# Supplementary material for: A Flexible and Transparent PtNP/Swcnt/Pet Electrochemical Sensor for Nonenzymatic Detection of Hydrogen Peroxide Released From Living Cells With Real-time Monitoring Capability
Source: Preprints.org preprint supplement (doi:10.20944/preprints202306.0486.v1), 2023-06-07
Supplement: Supplementary file 3 [file supplementary]

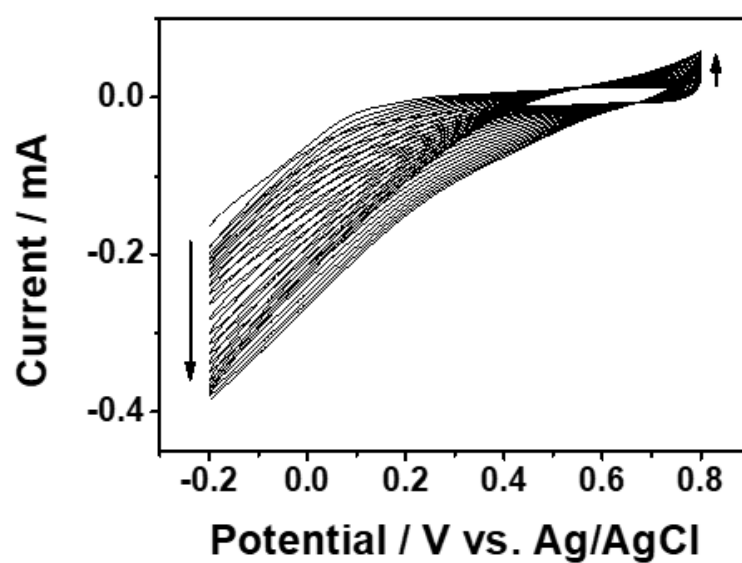

**Figure S1.** CV curves of SWCNT/PET film electrode in 1 mg/mL chloroplatinic acid hexahydrate at a scan rate of 50 mV for 20 cycles.
