# Supplementary material for: A Flexible and Transparent PtNP/Swcnt/Pet Electrochemical Sensor for Nonenzymatic Detection of Hydrogen Peroxide Released From Living Cells With Real-time Monitoring Capability
Source: Preprints.org preprint supplement (doi:10.20944/preprints202306.0486.v1), 2023-06-07
Supplement: Supplementary file 4 [file supplementary]

Archive with 3 entries (3 files):
- Figure S1.pdf
- Figure S2.pdf
- Figure S3.pdf
