# Supplementary figures and images for: A Flexible and Transparent PtNP/Swcnt/Pet Electrochemical Sensor for Nonenzymatic Detection of Hydrogen Peroxide Released From Living Cells With Real-time Monitoring Capability
Source: Preprints.org preprint supplement (doi:10.20944/preprints202306.0486.v1), 2023-06-07

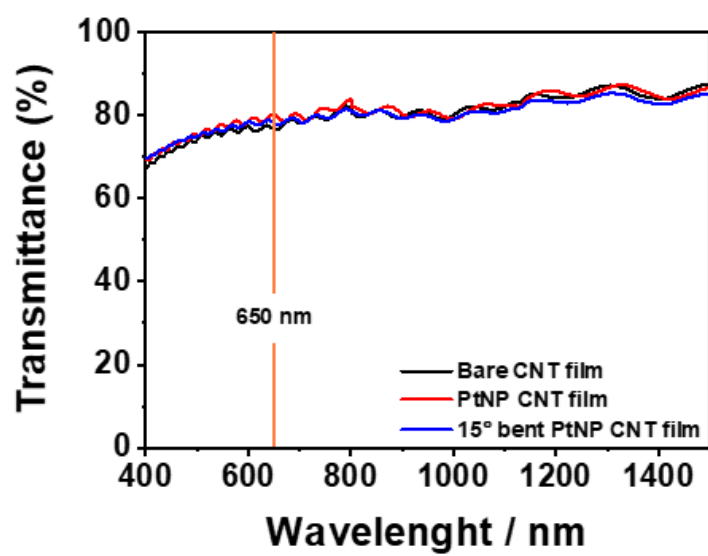

**Figure S2.** Transmittance of bare SWCNT, flat PtNP/SWCNT film, and bent PtNP/SWCNT film.

Supplement: Supplementary file 2 [file supplementary]
